# Supplementary material
Source: PubMed Central journal article supplement (PMC6059168)

# IFCD<sub>LT</sub> (R > 0.3; 14.4 min; HCP)

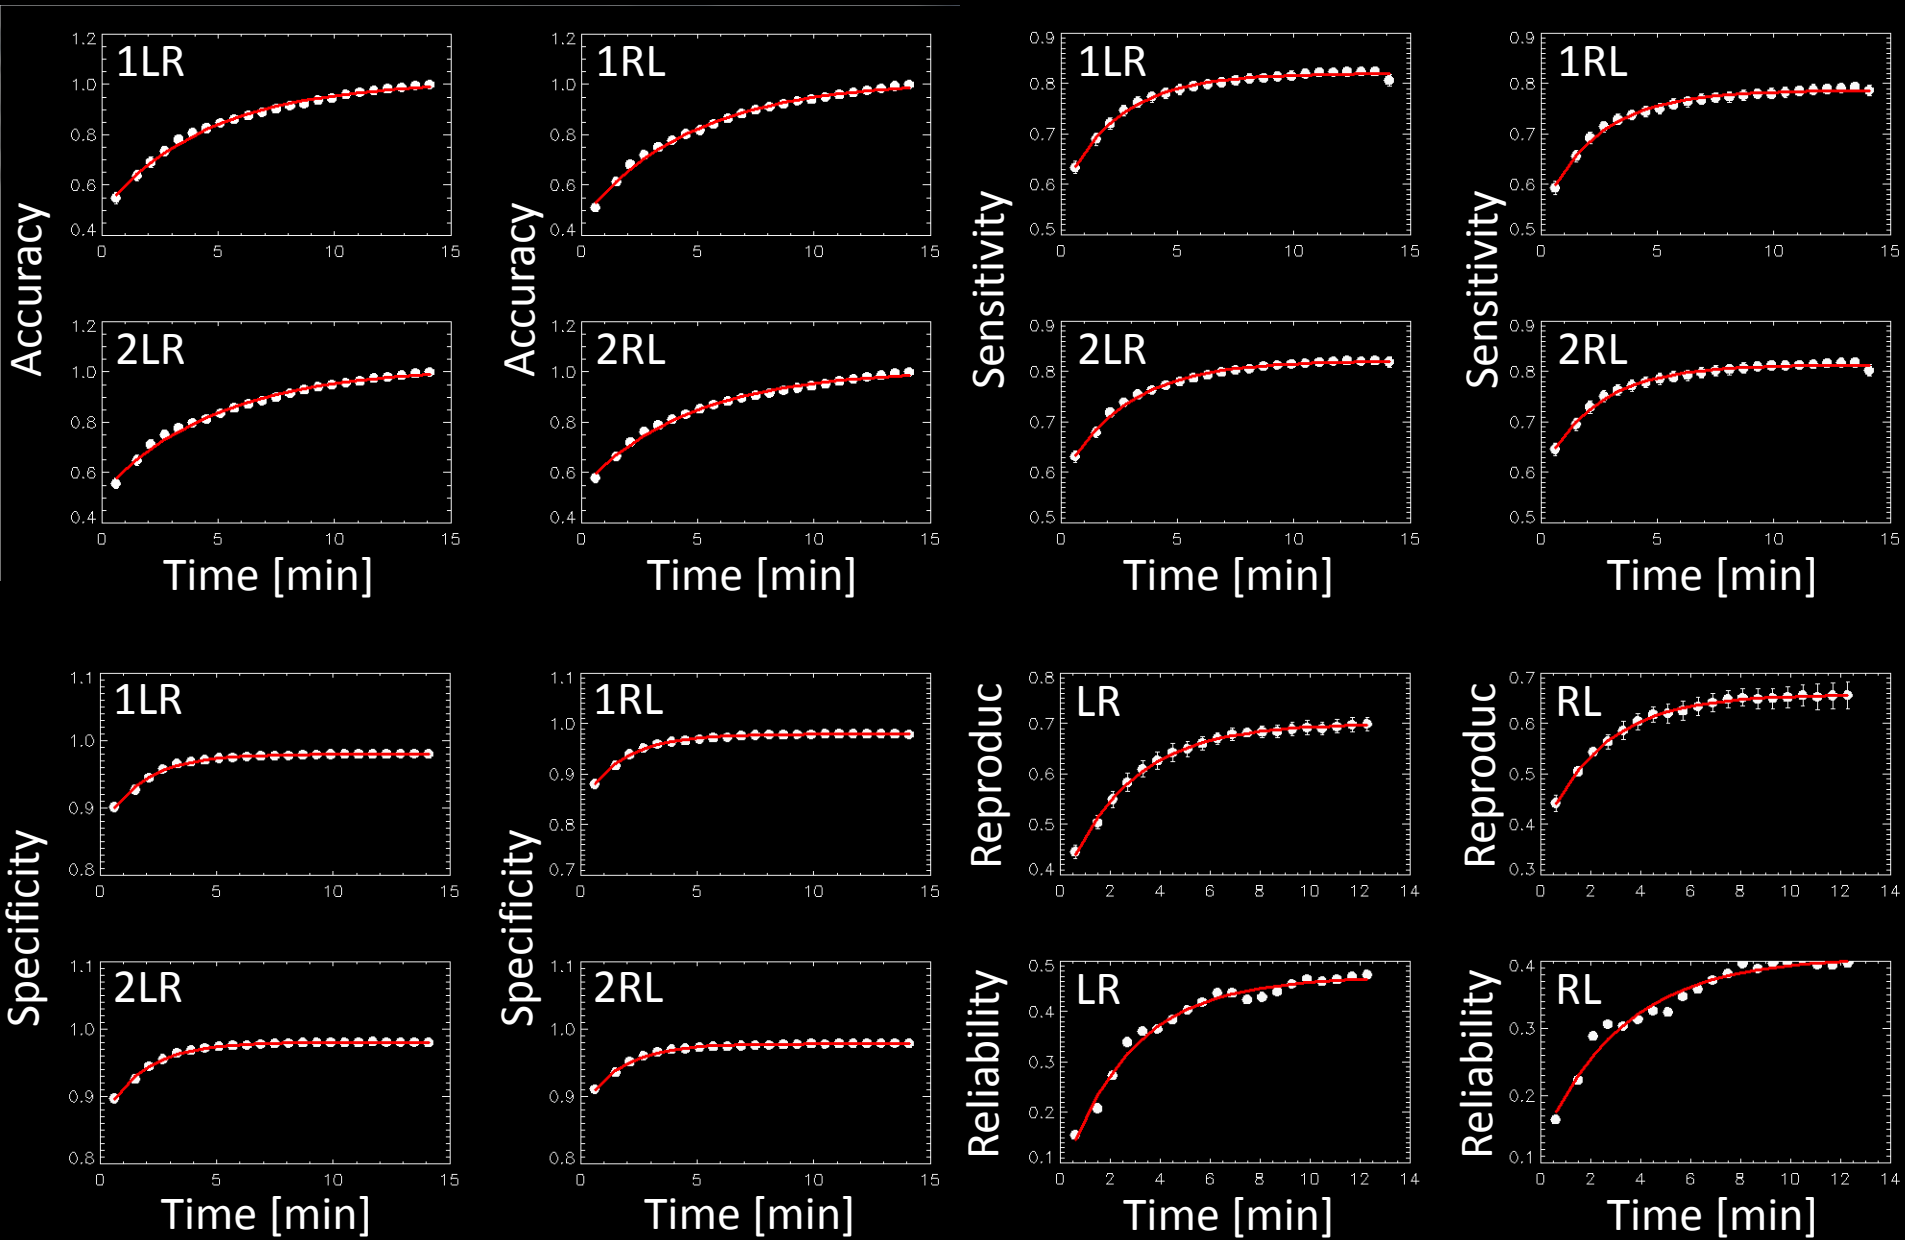

# IFCD<sub>HT</sub> (R > 0.5; 14.4 min; HCP)

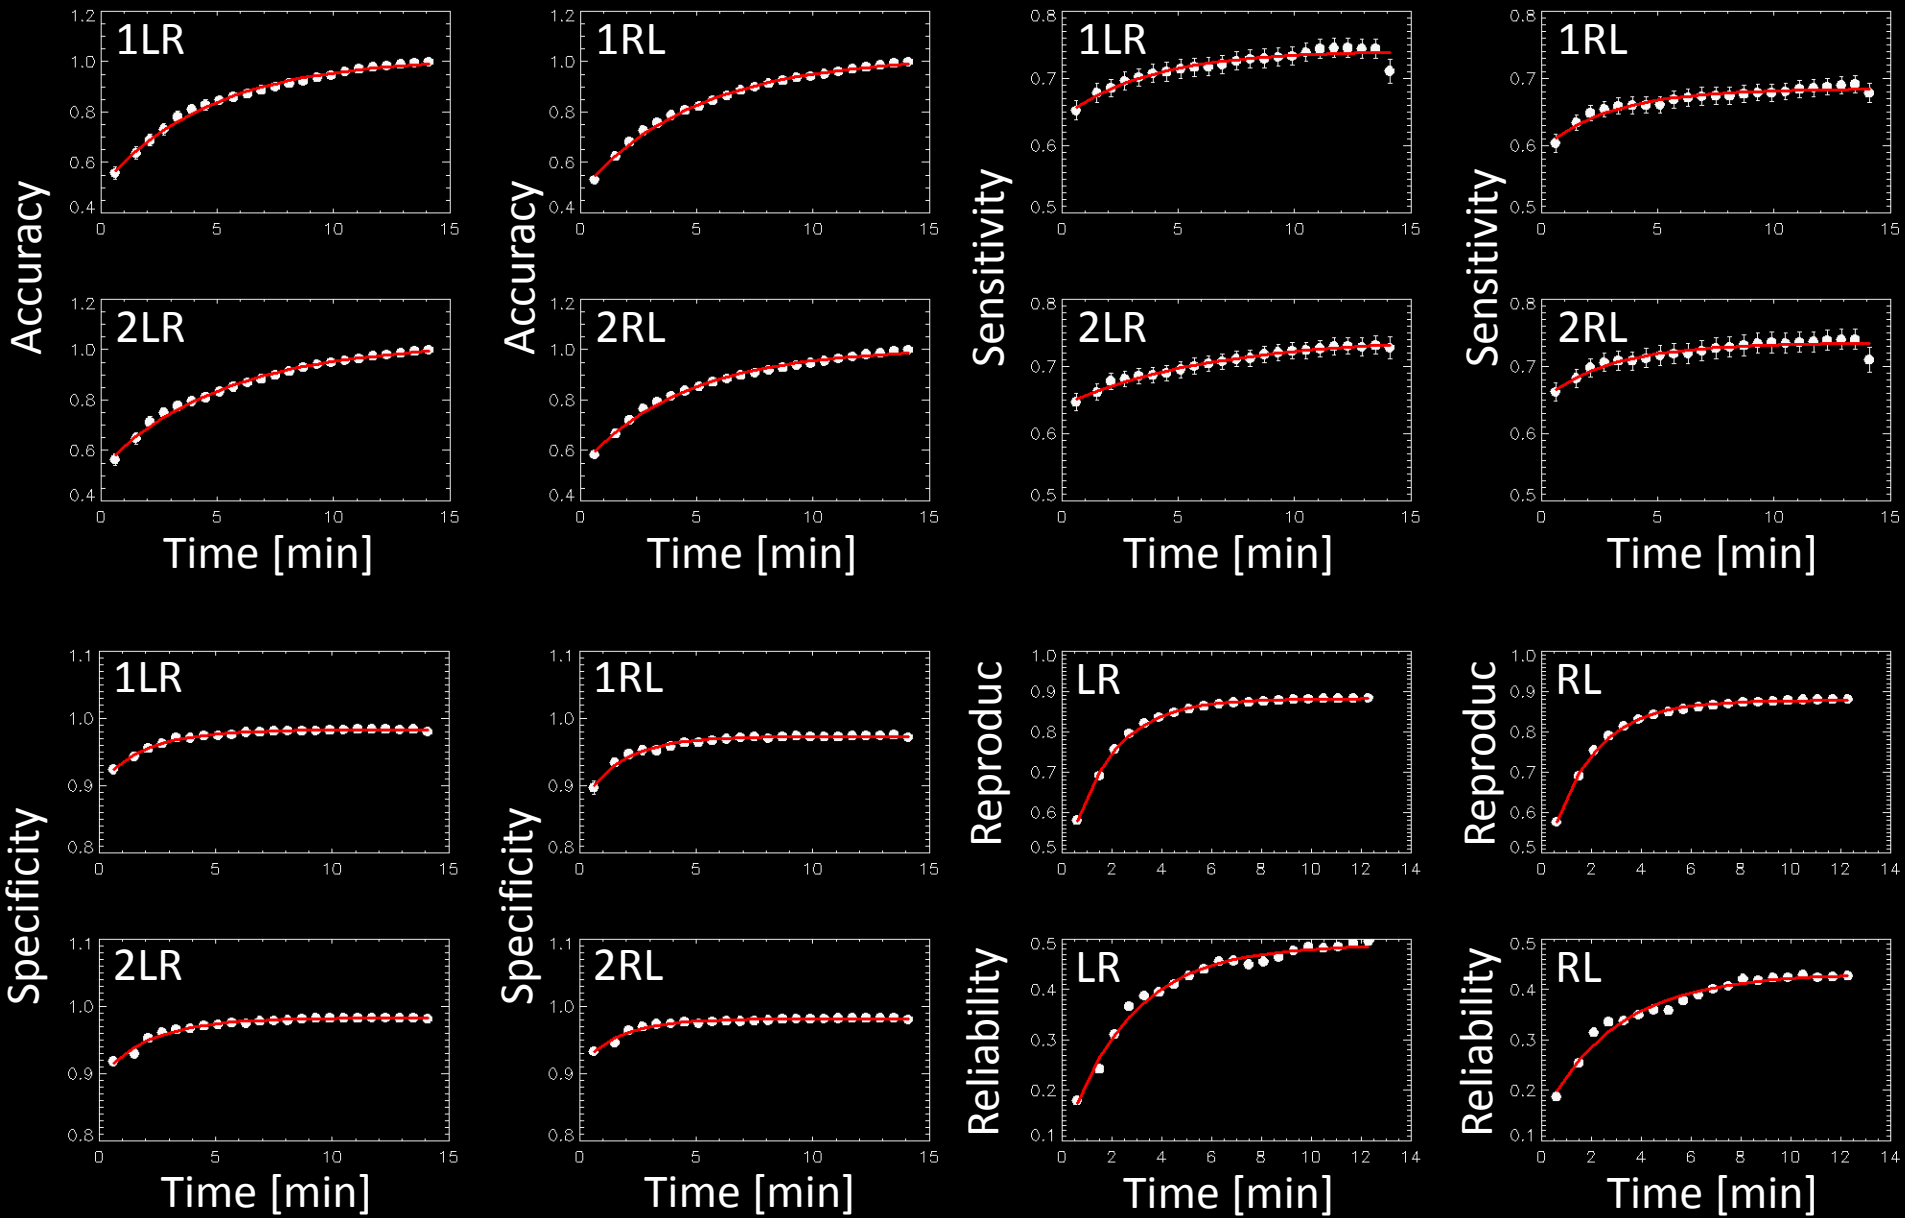

# IFCD<sub>HT</sub> (7 min; HCP)

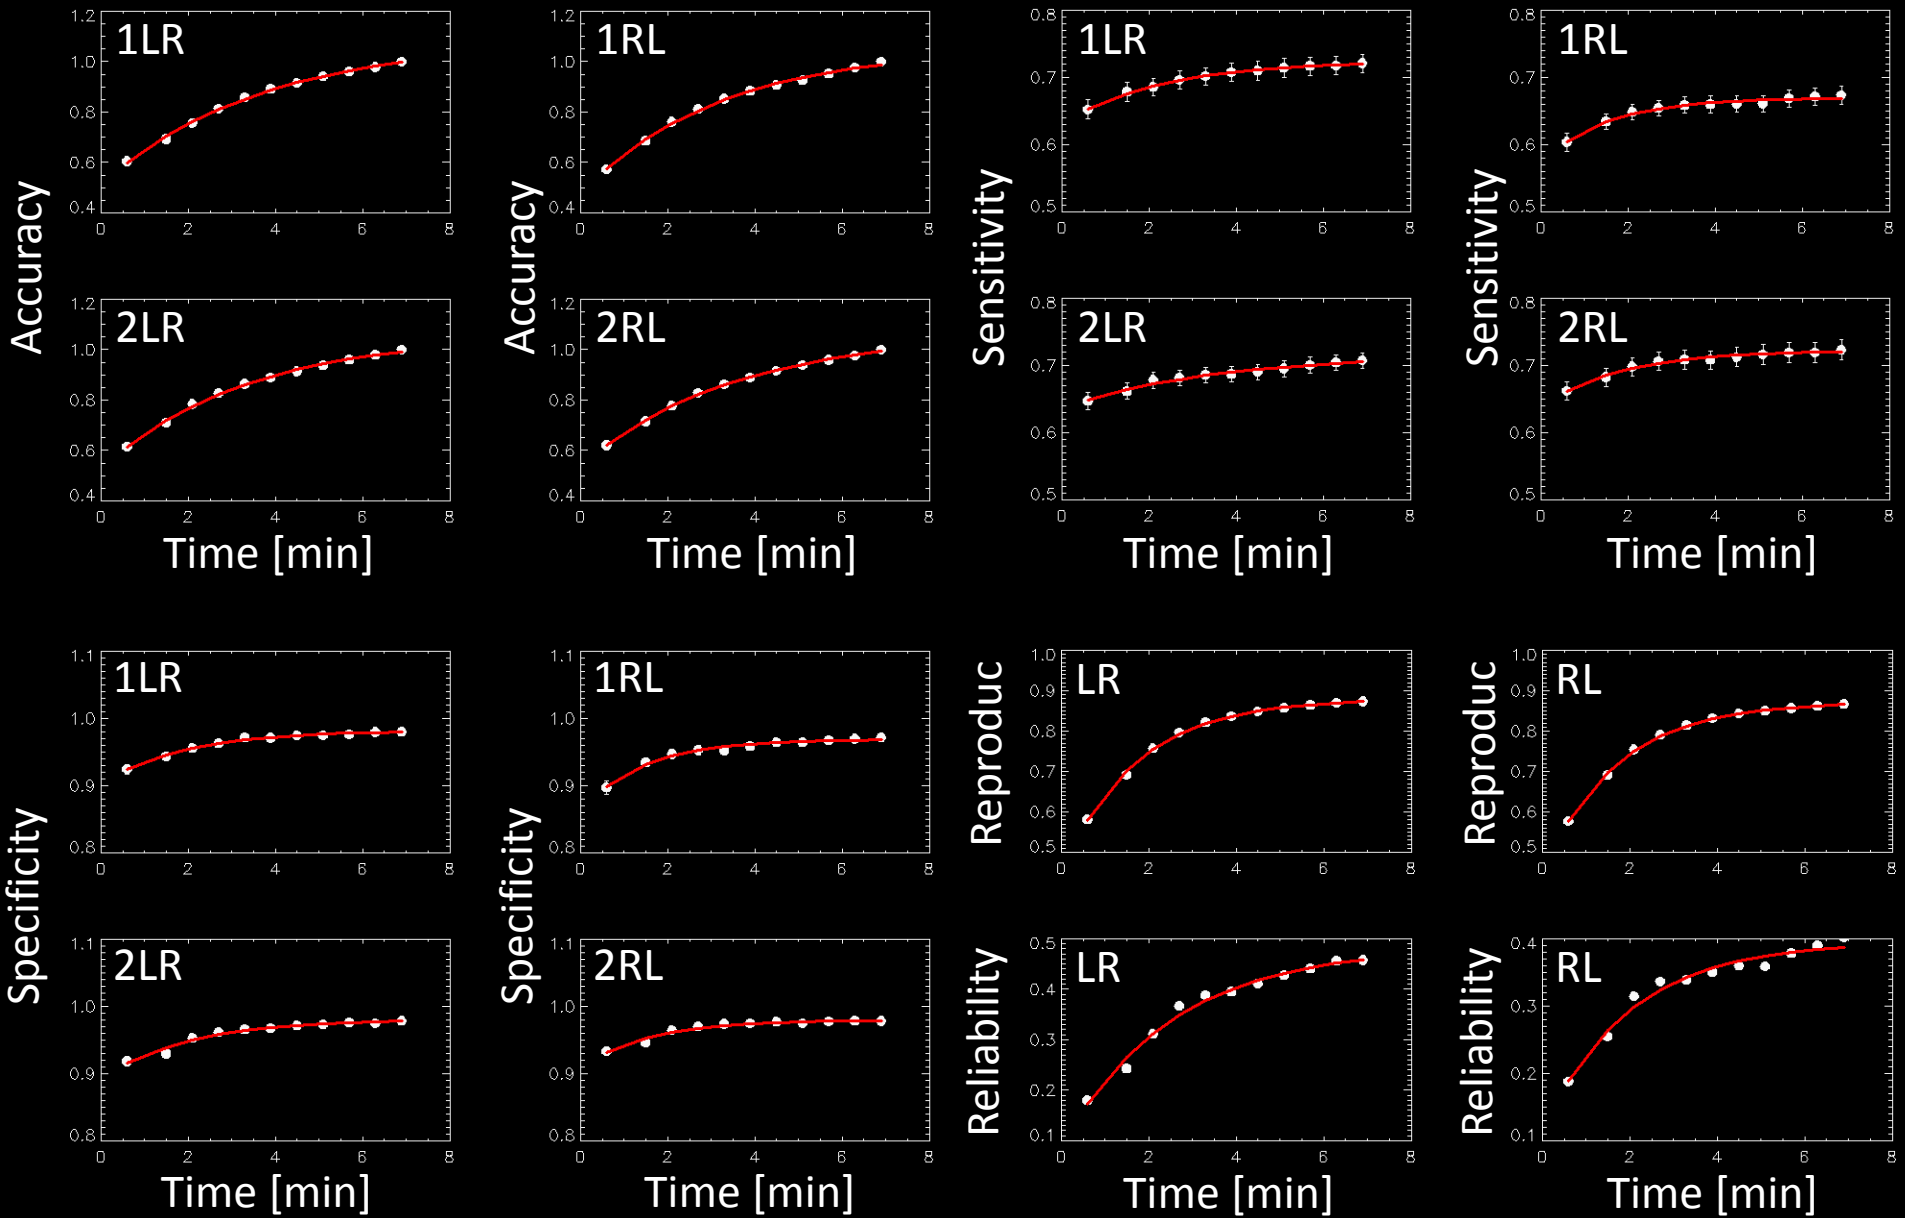

# FC<sub>max</sub> (14.4 min; HCP)

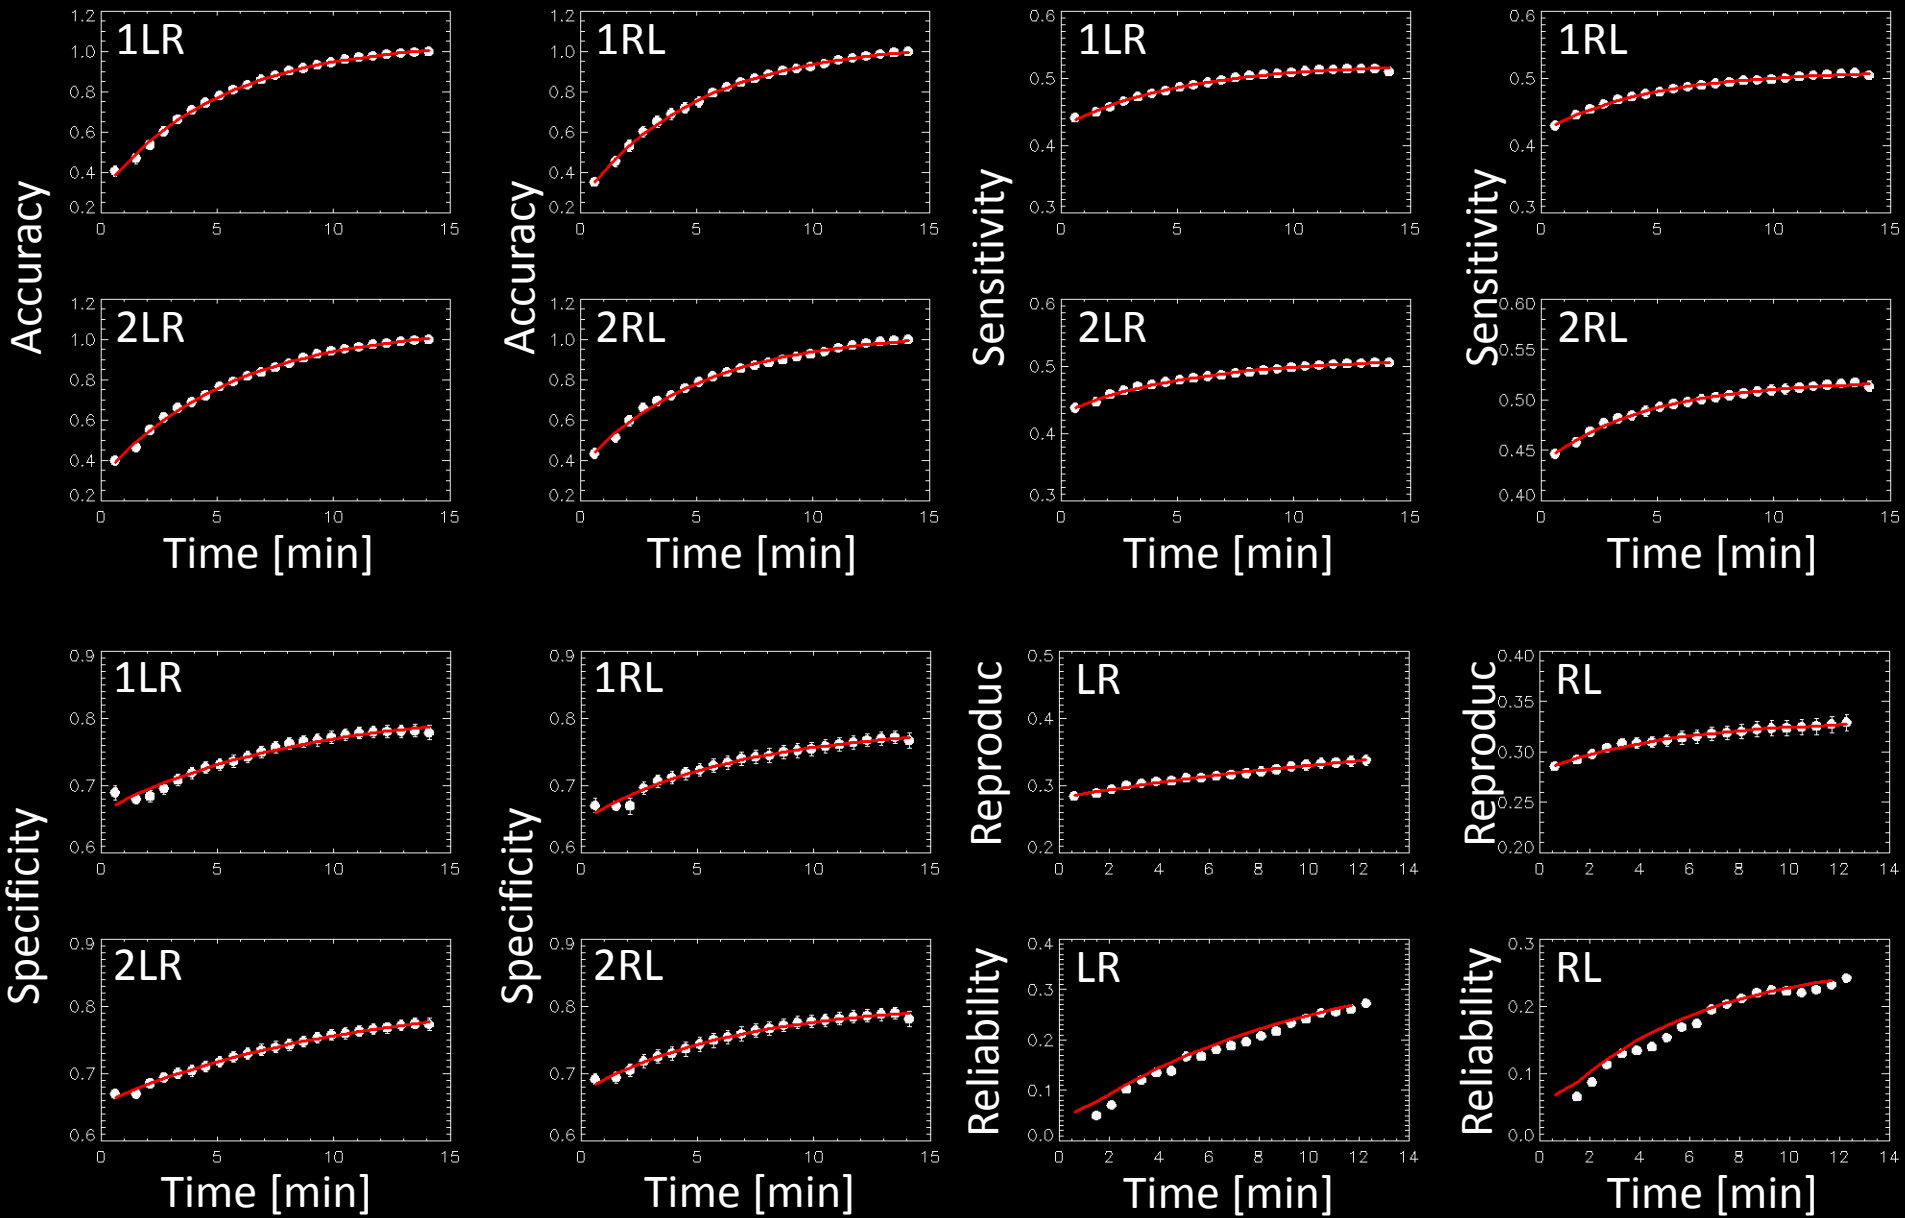

# FC<sub>THA</sub> (14.4 min; HCP)

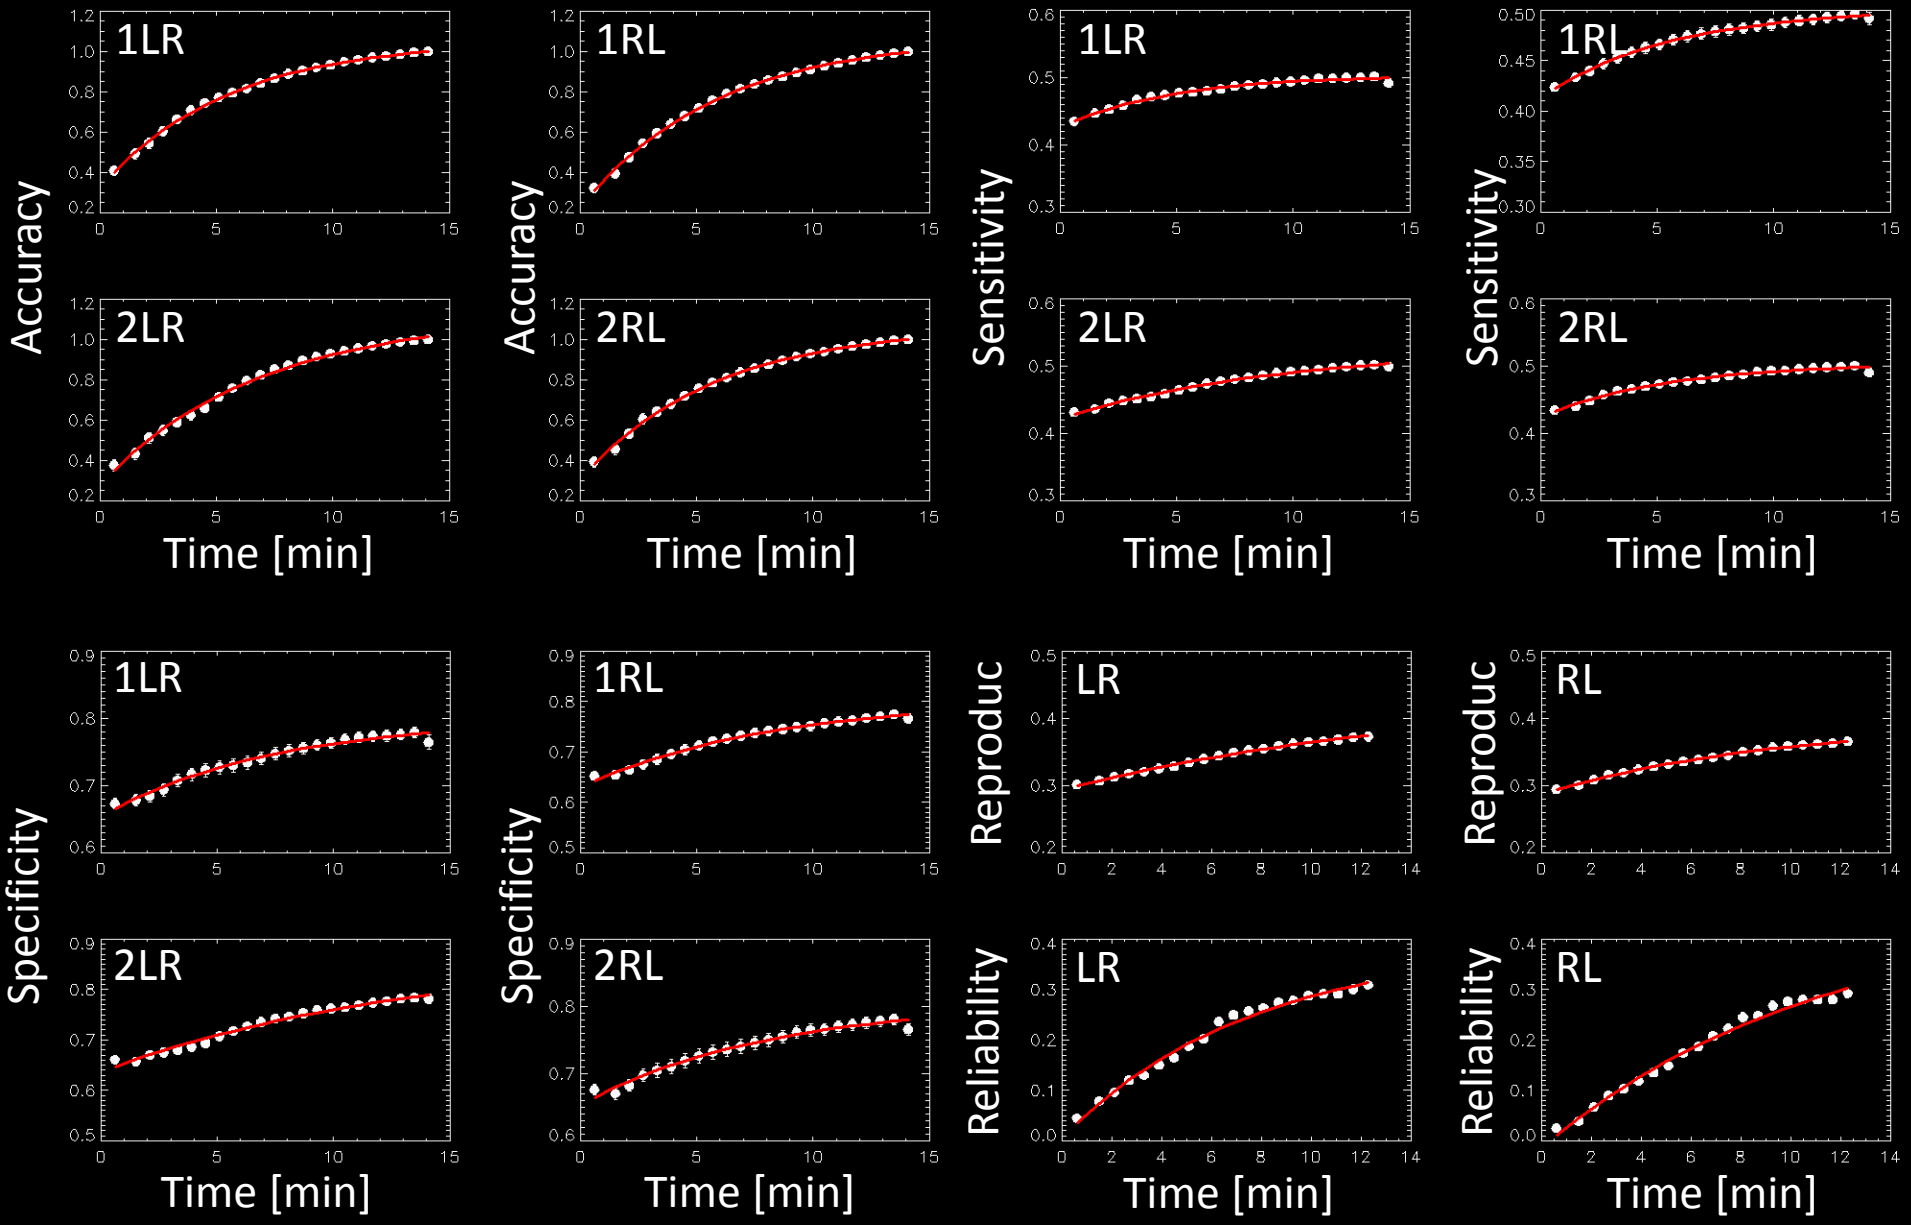

# FC<sub>DCP</sub> (14.4 min; HCP)

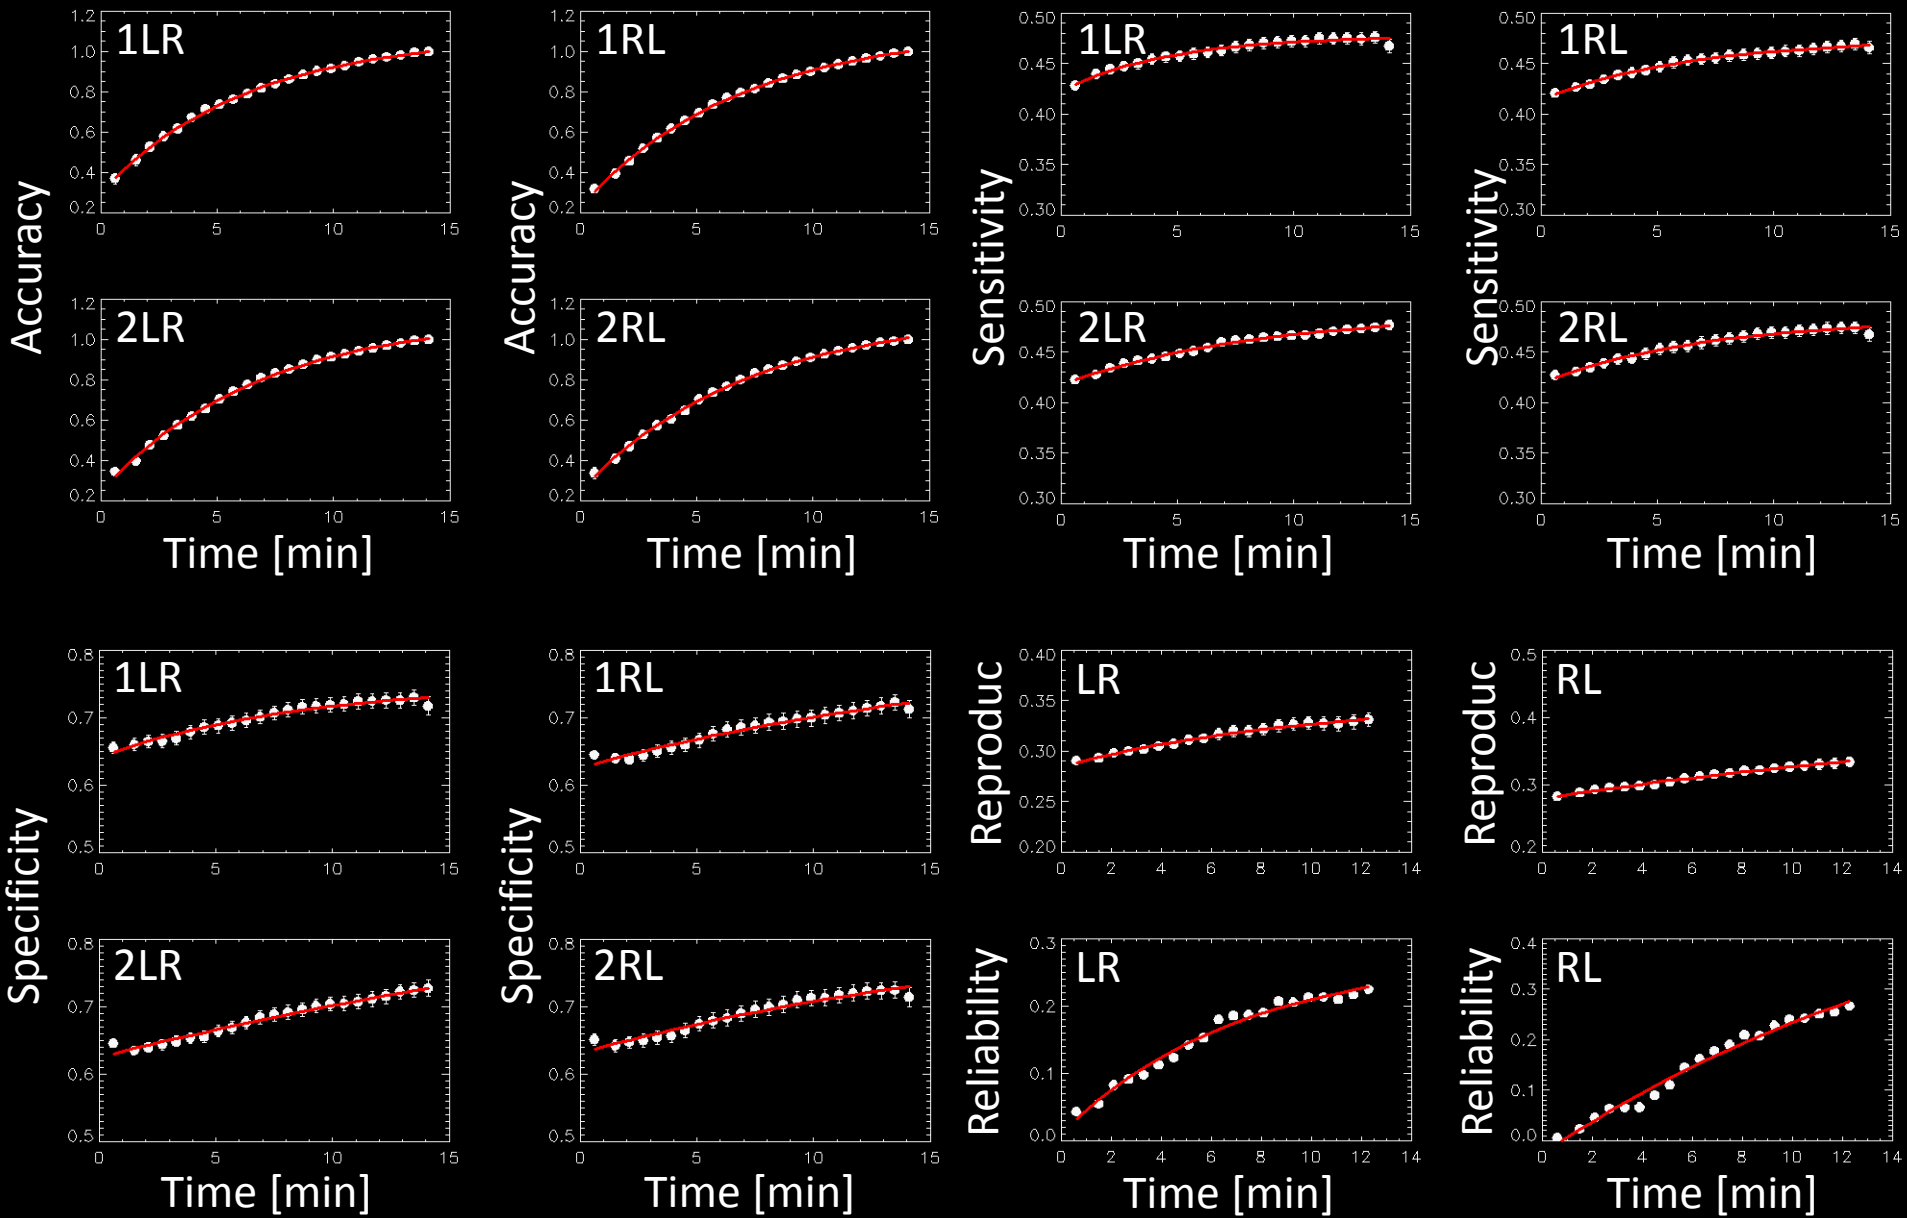

# FC<sub>IPC</sub> (14.4 min; HCP)

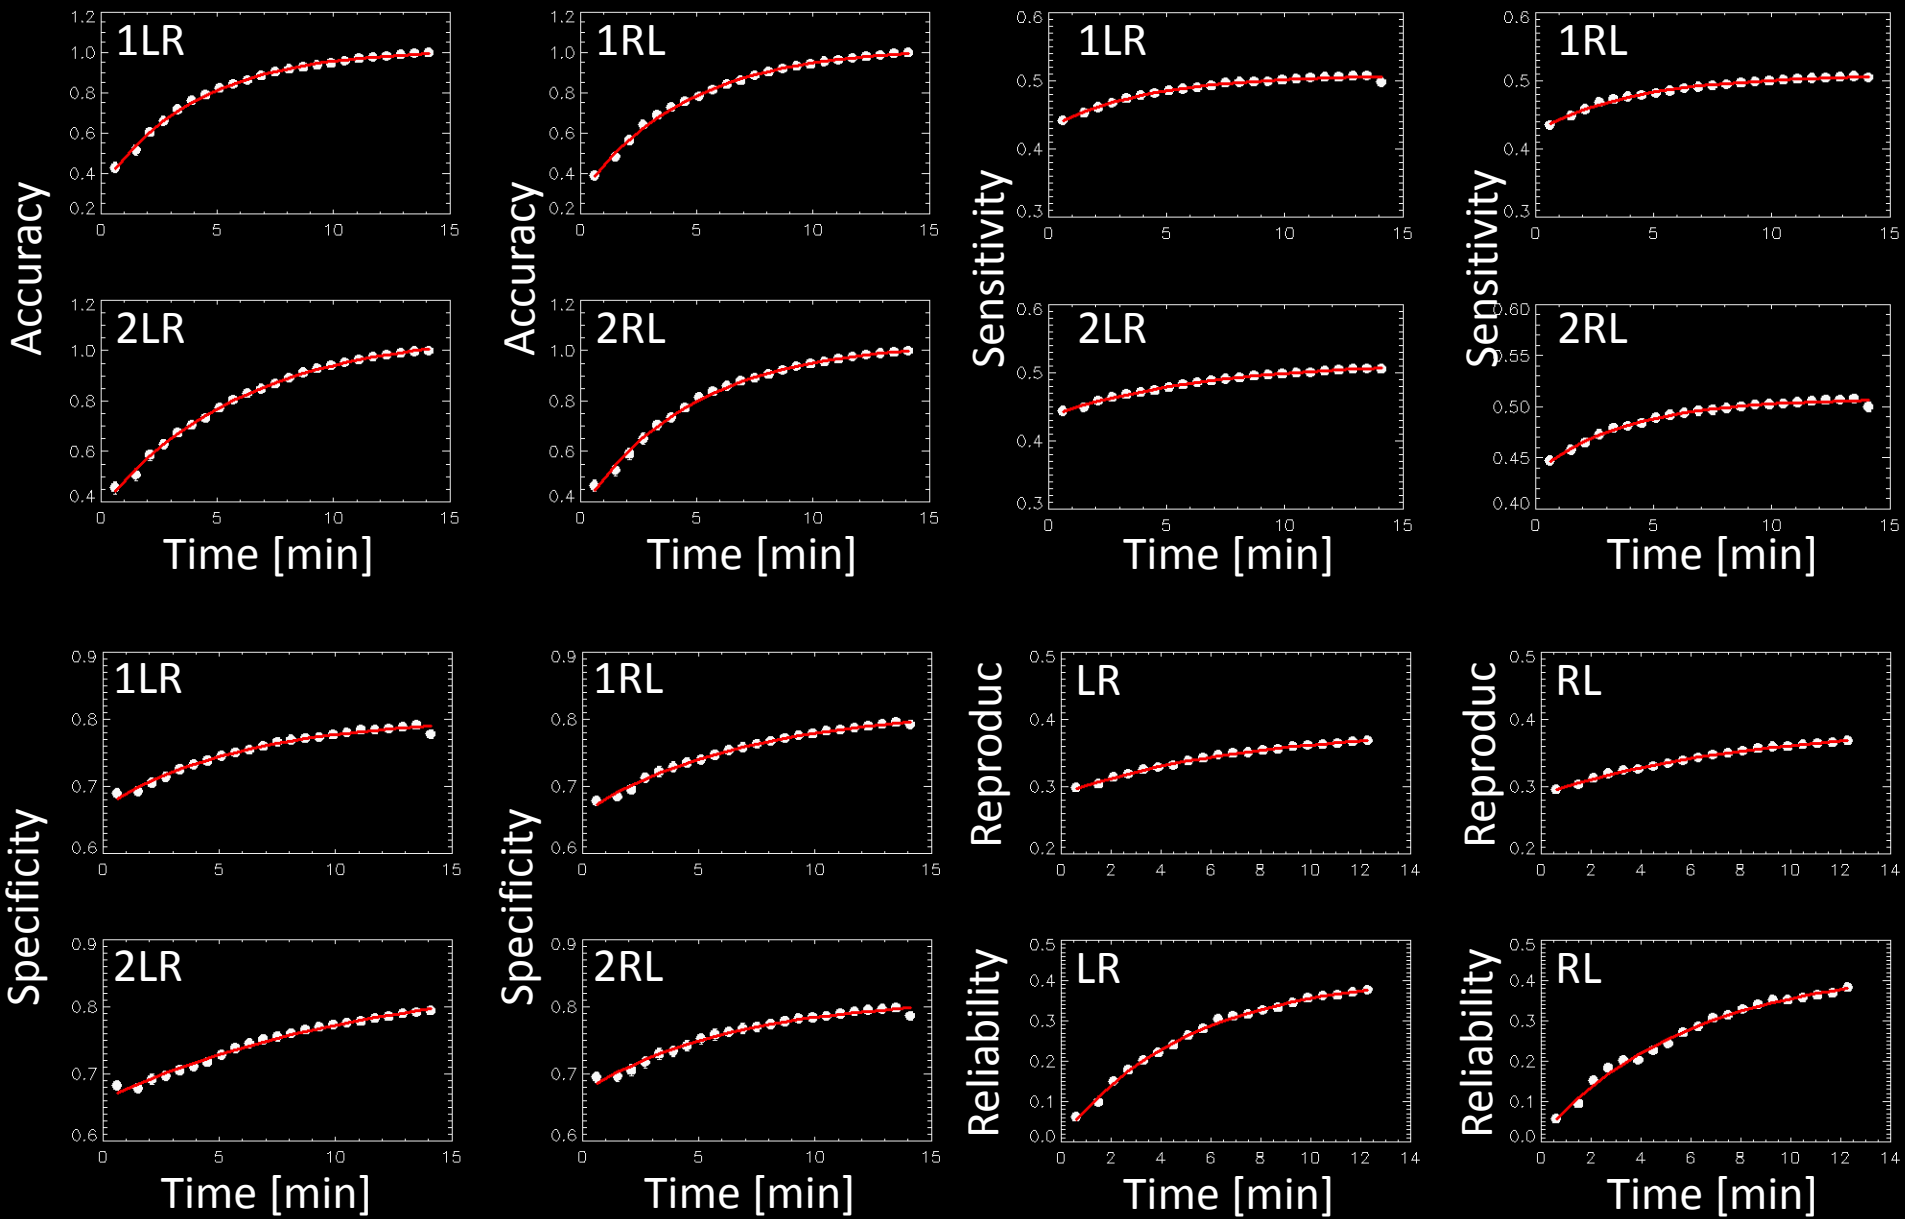

# FC<sub>PFC</sub> (14.4 min; HCP)

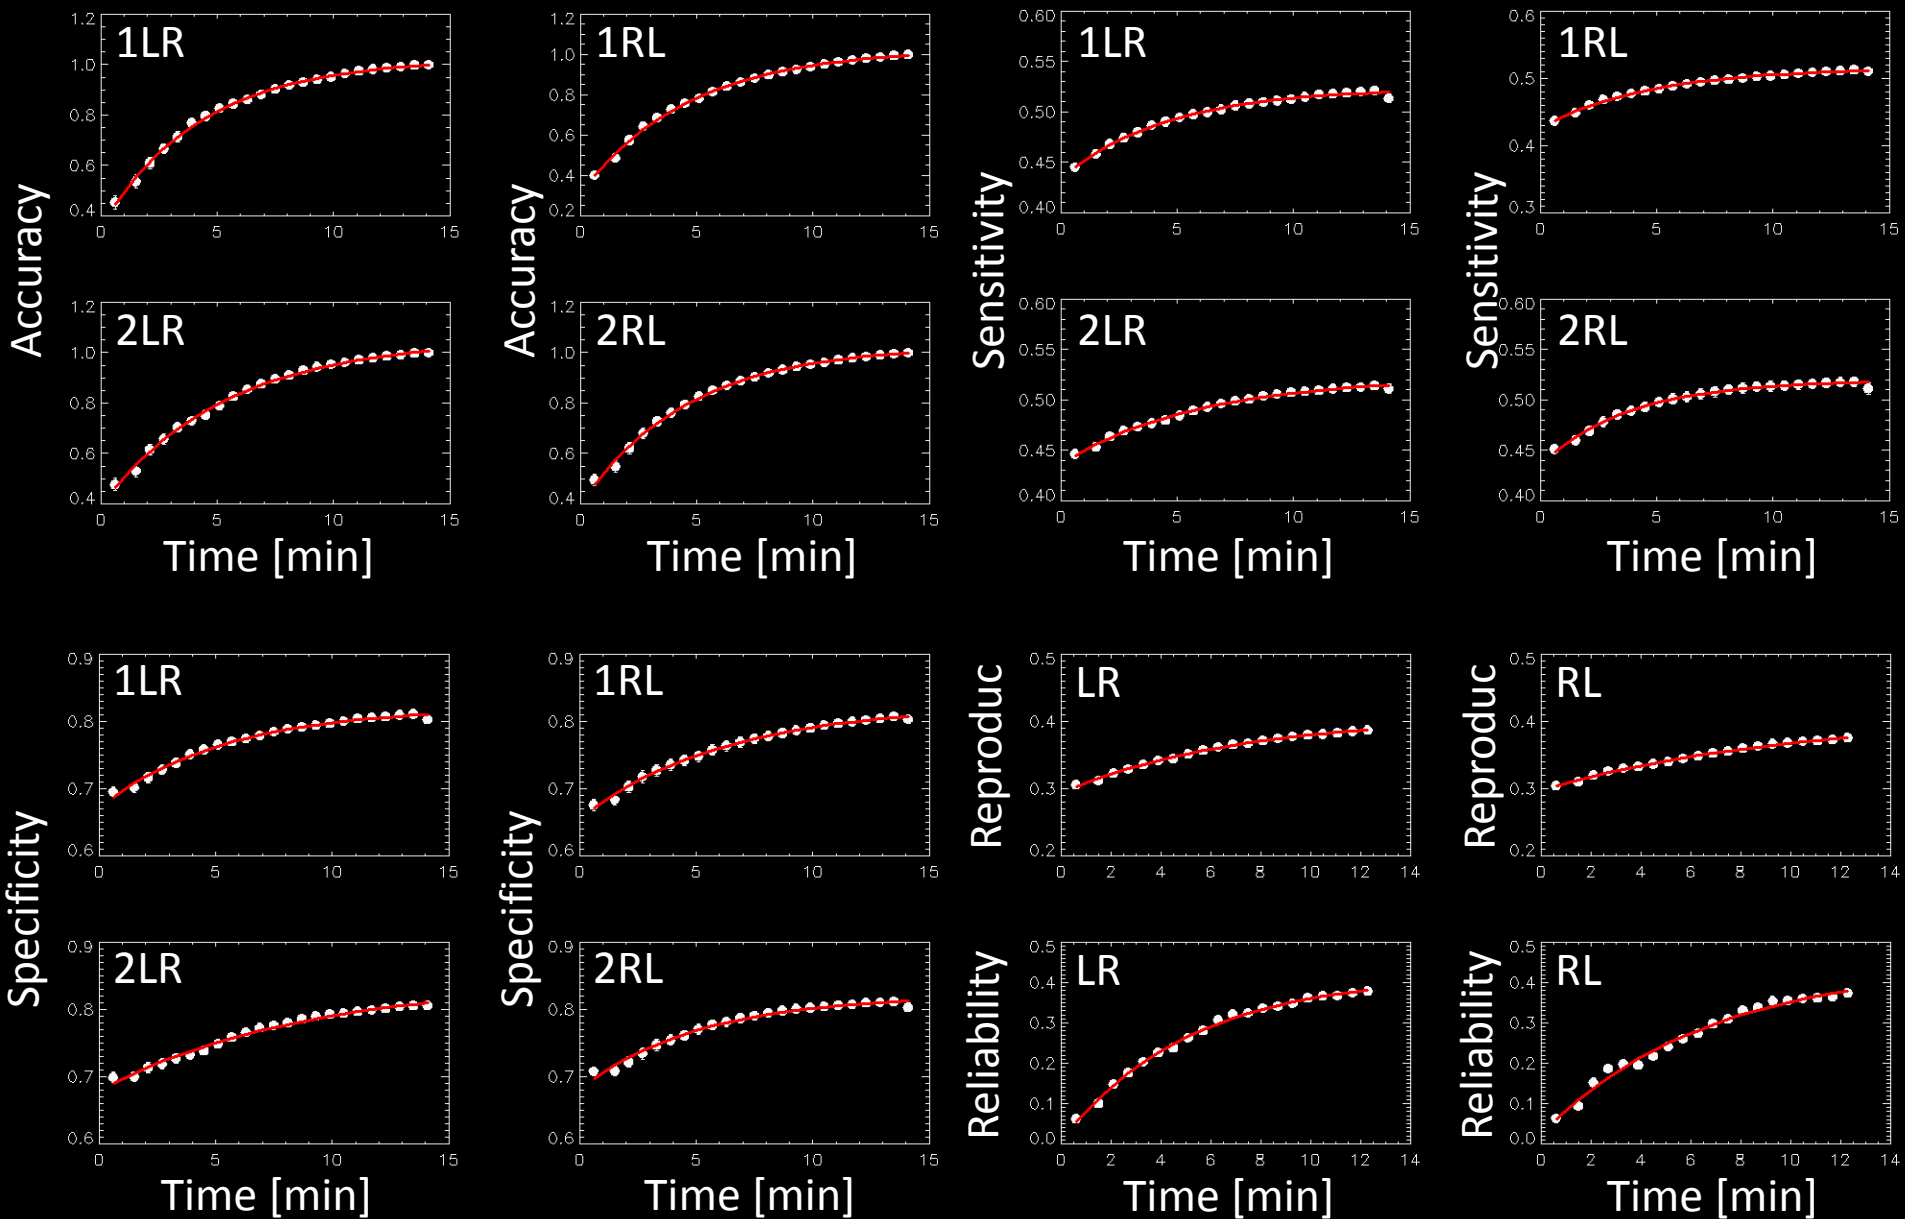



# FC<sub>max</sub> (7 min; HCP)

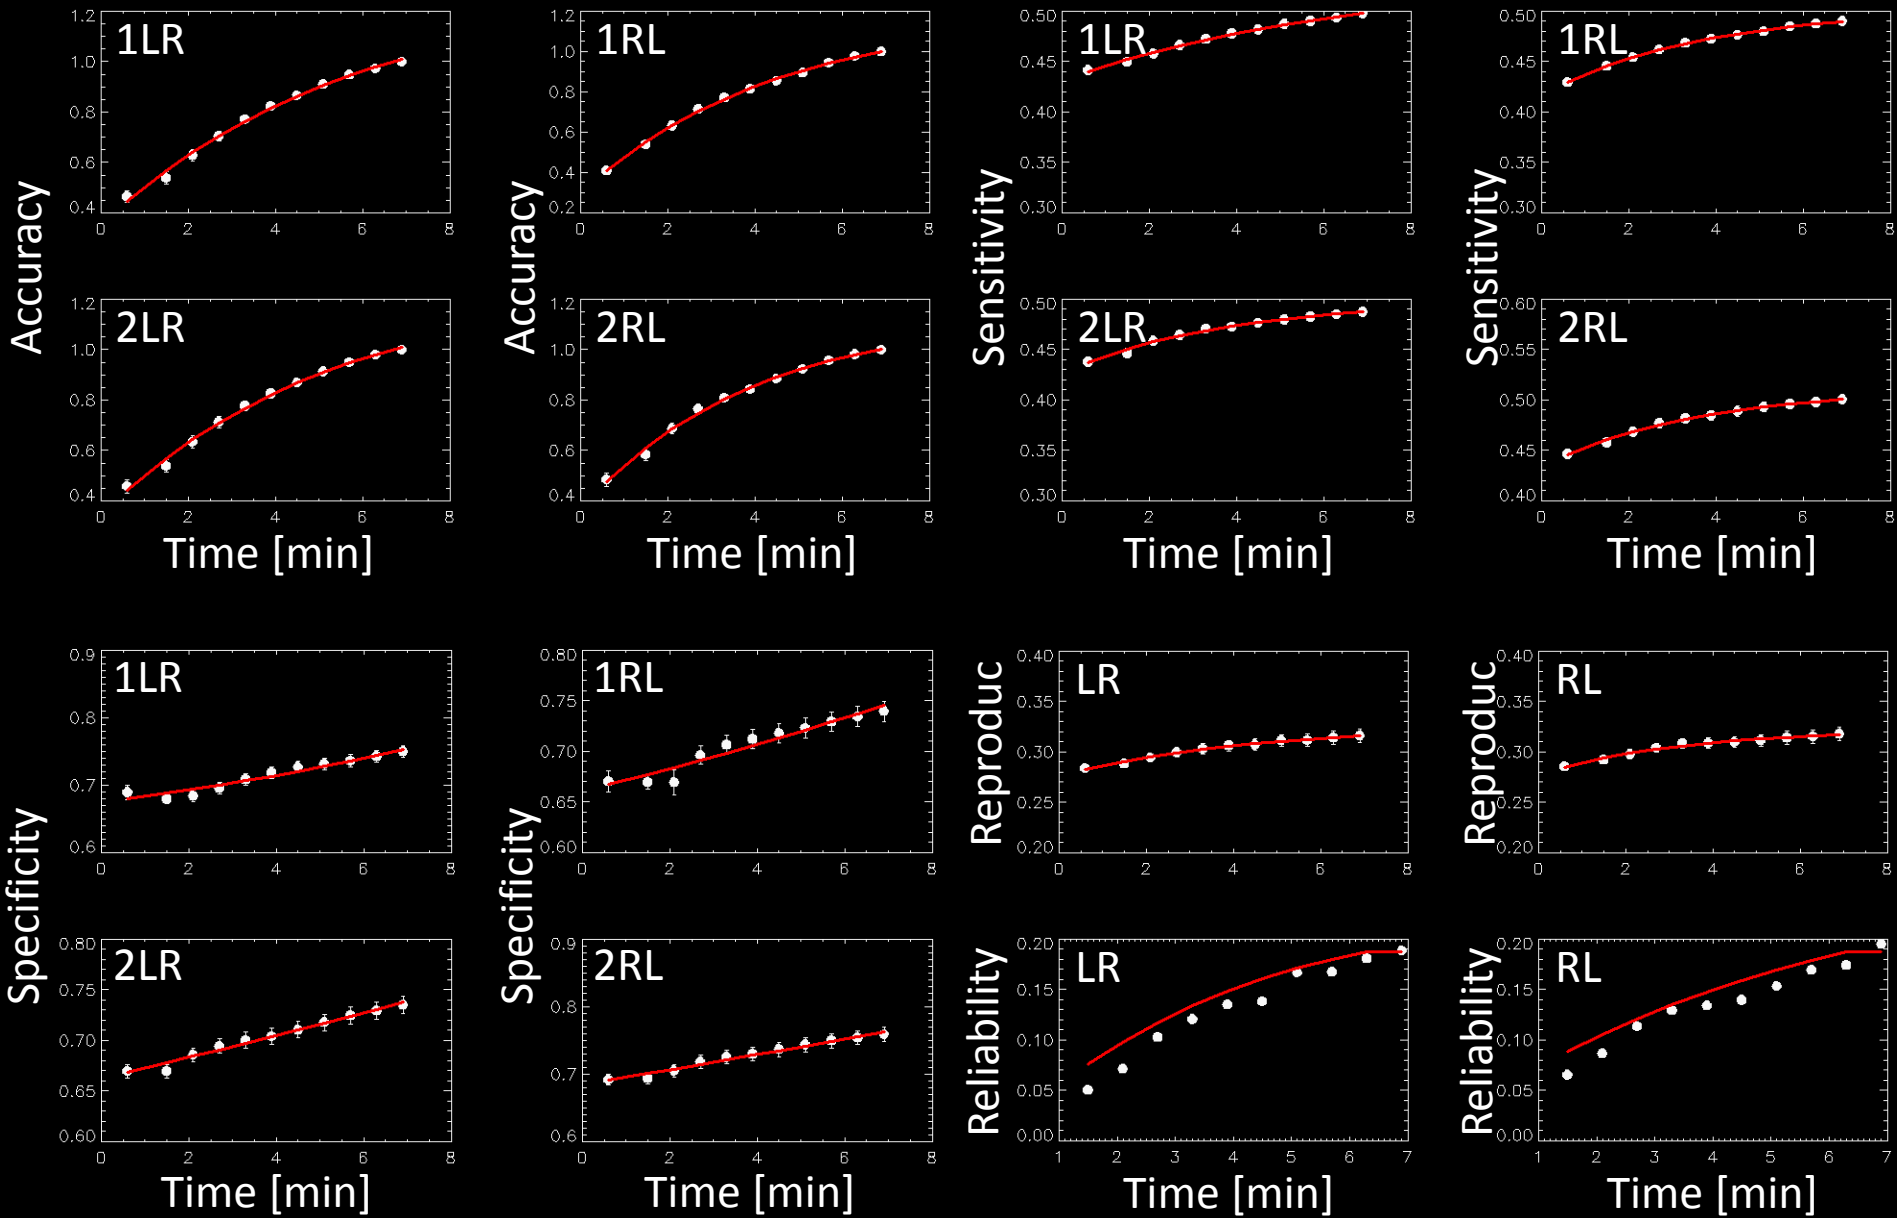

# sICA<sub>250</sub> (14.4 min; HCP)

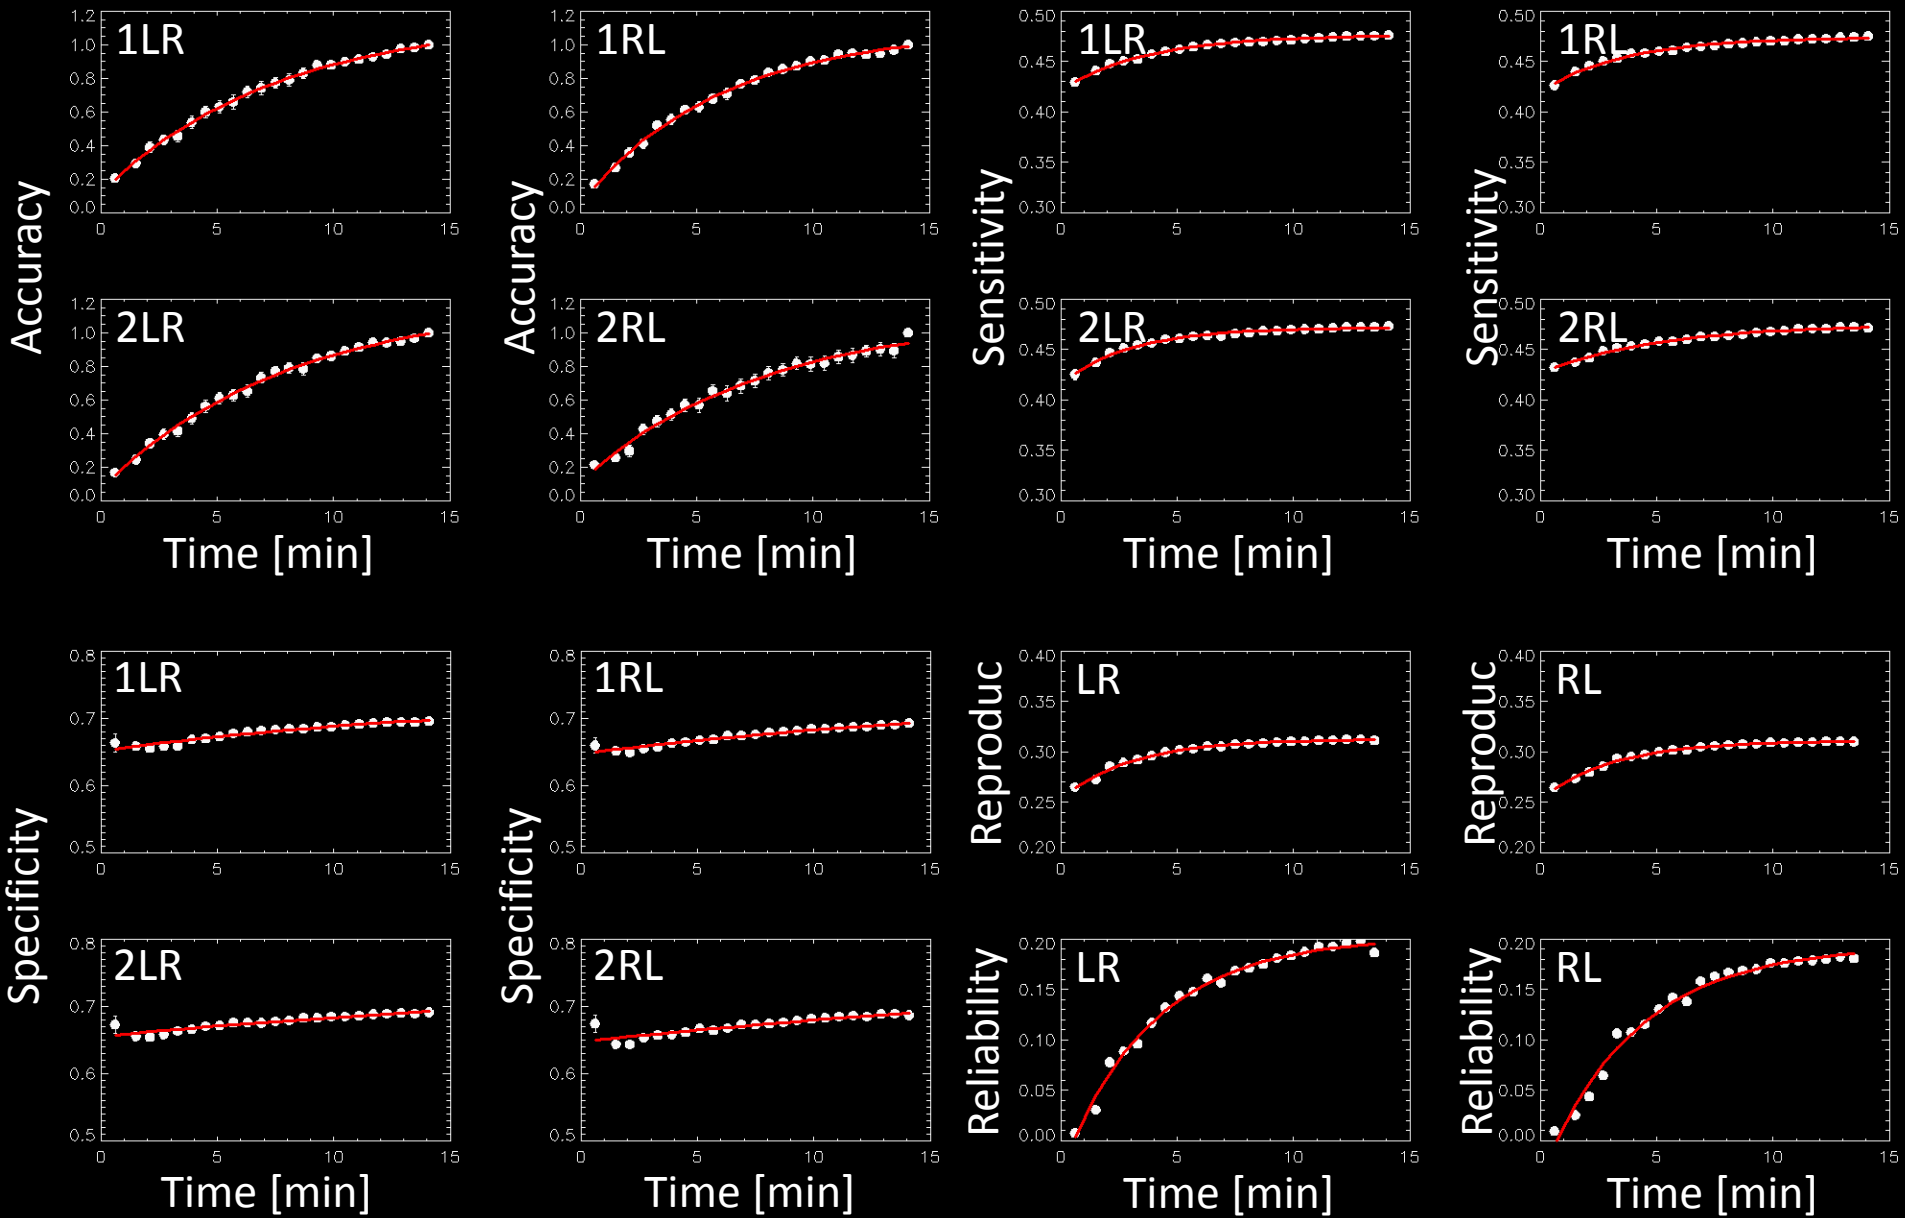

# sICA<sub>50</sub> (14.4 min; HCP)

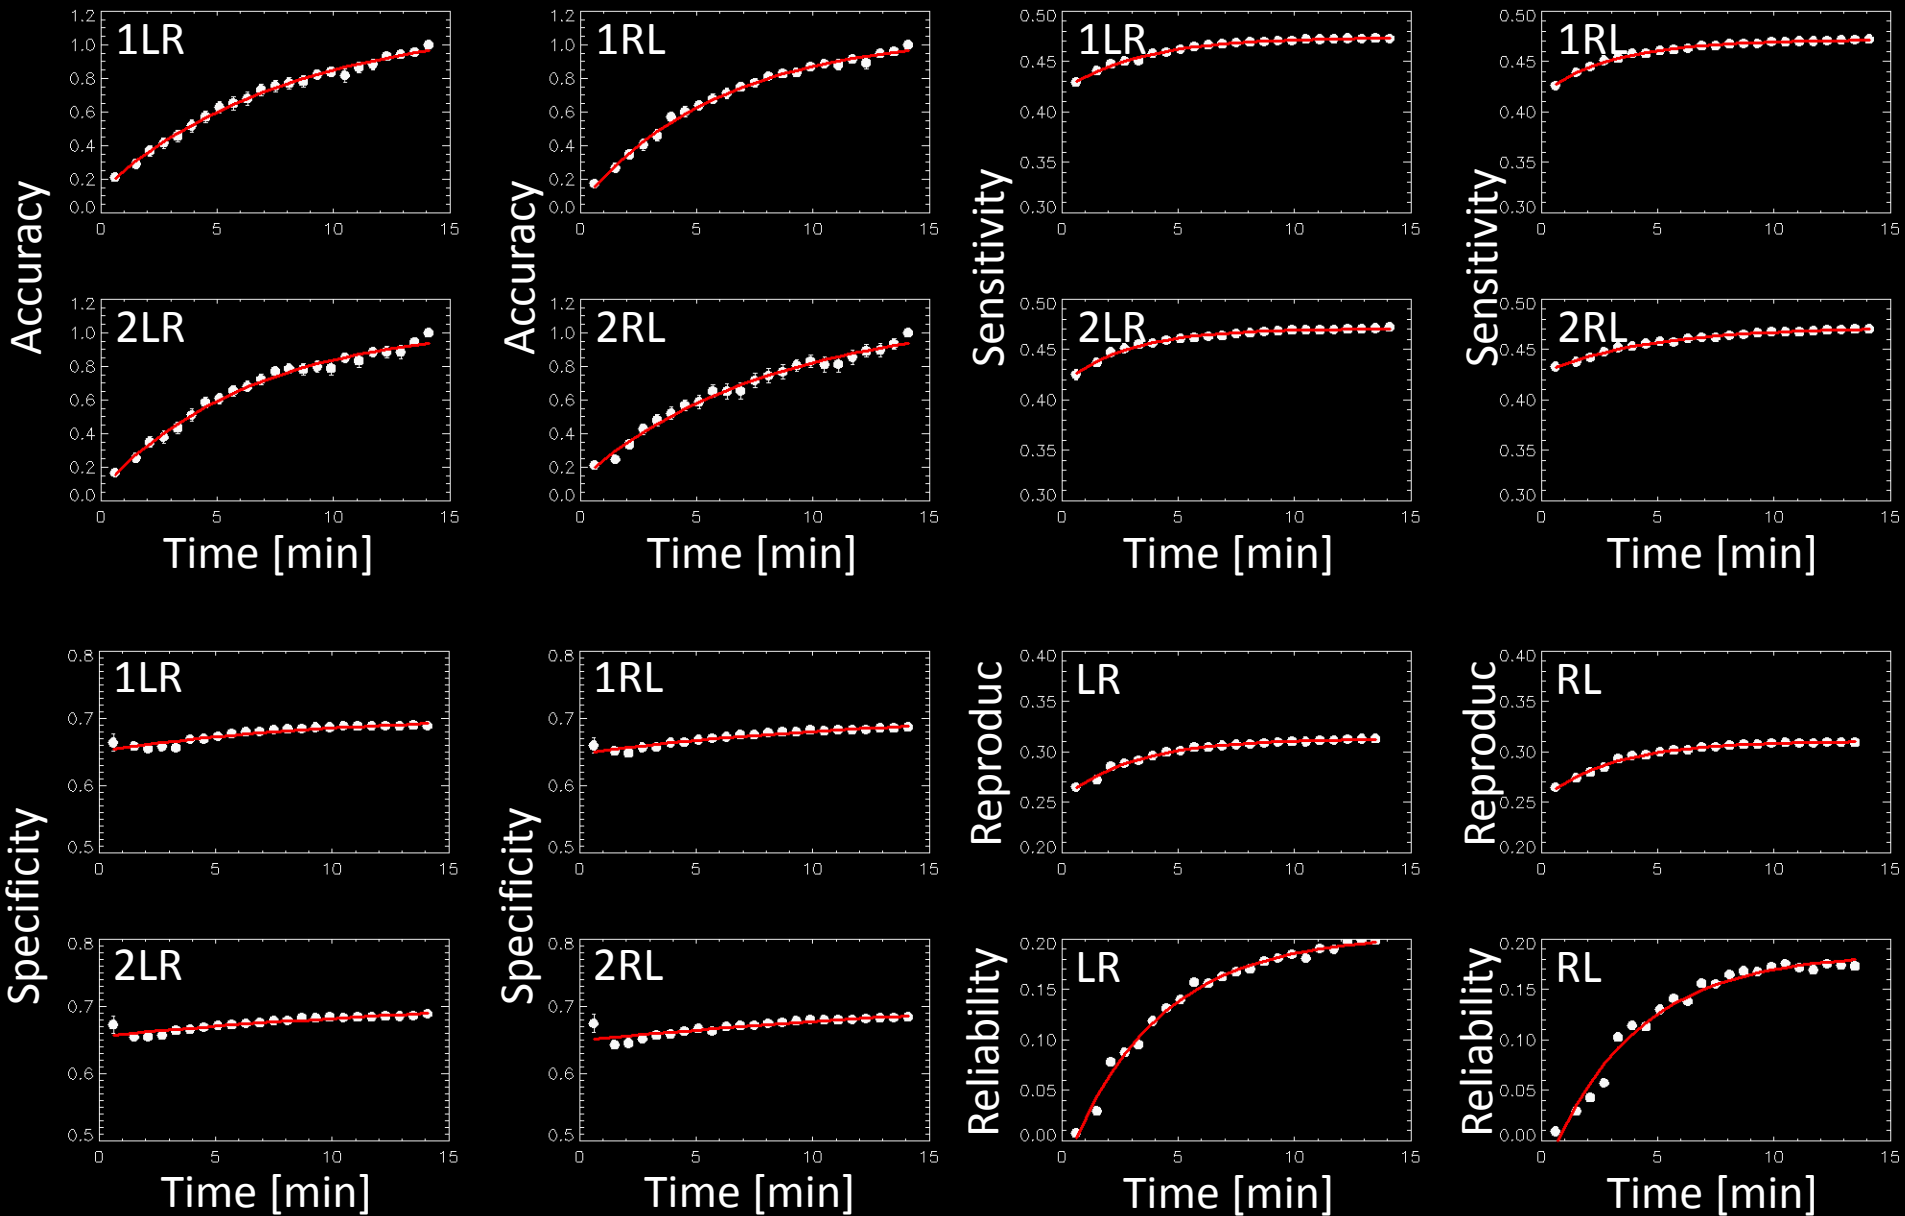

# IFCD<sub>HT</sub> (R > 0.5; FCP & CoRR)

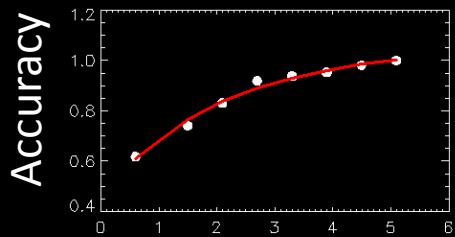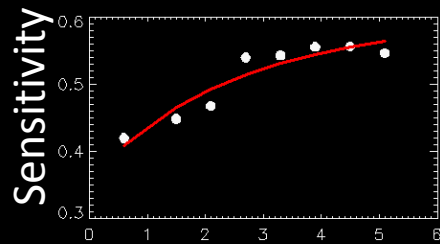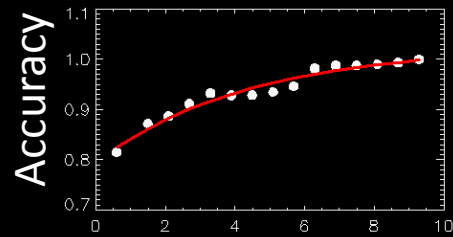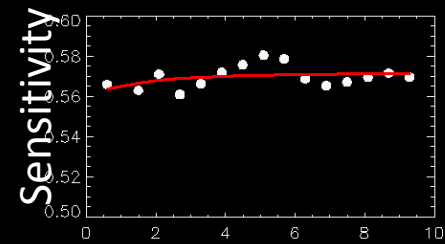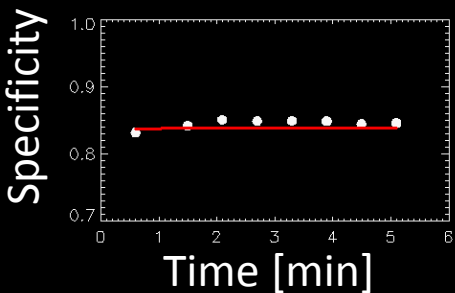

FCP-Cambridge

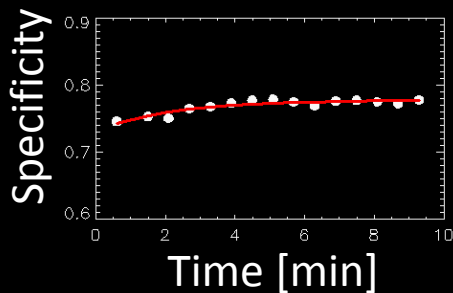

CoRR-HNU

# FC<sub>PFC</sub> (FCP & CoRR)

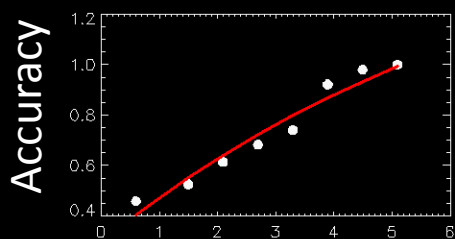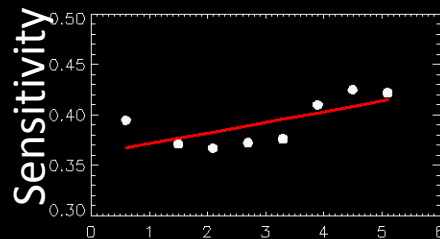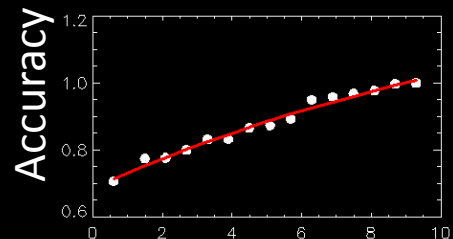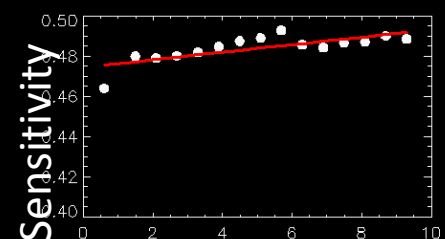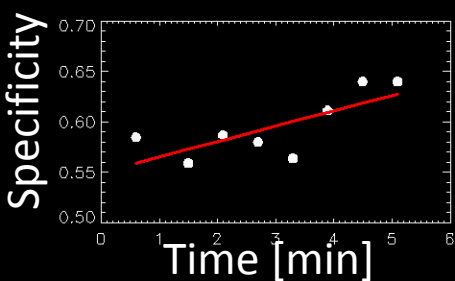

FCP-Cambridge

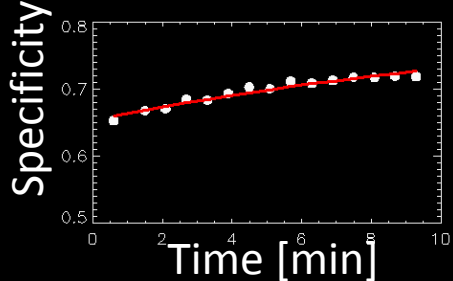

CoRR-HNU

# 57.6 min; HCP

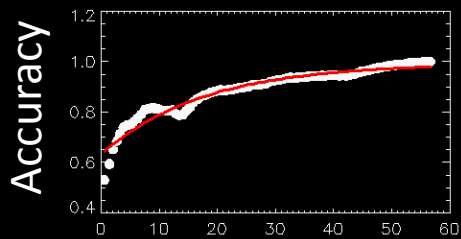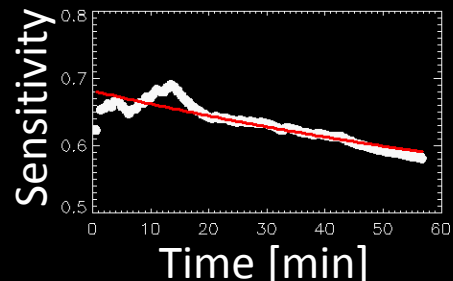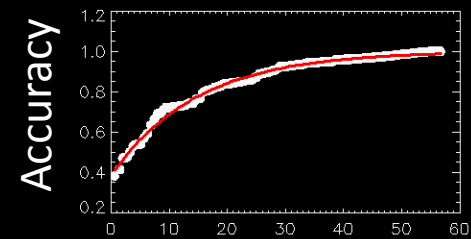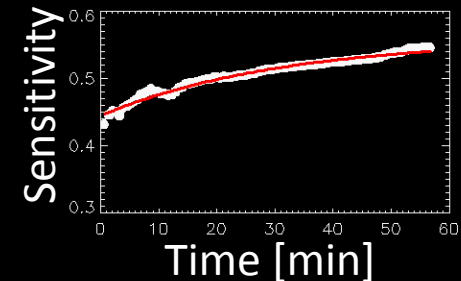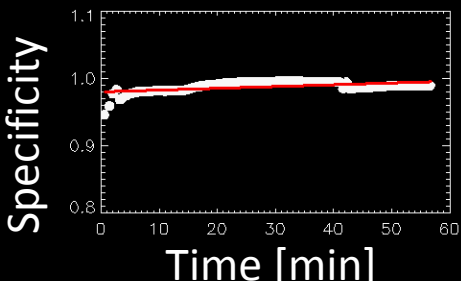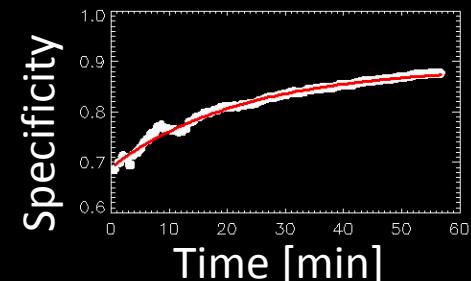

# 60 min; CoRR-HNU

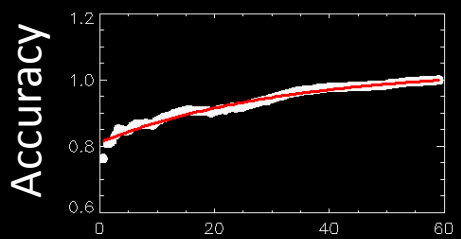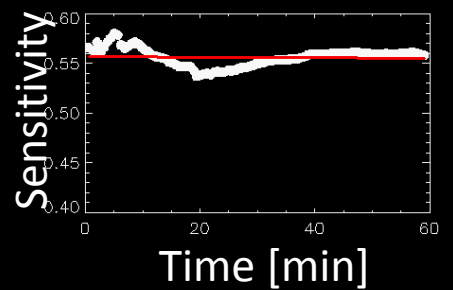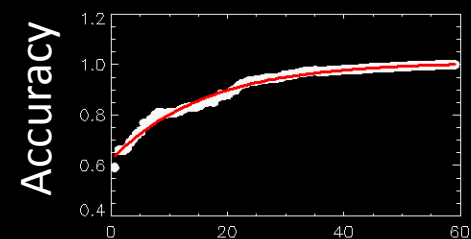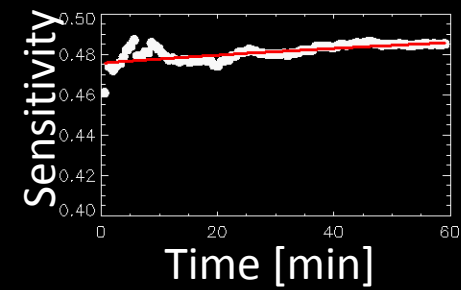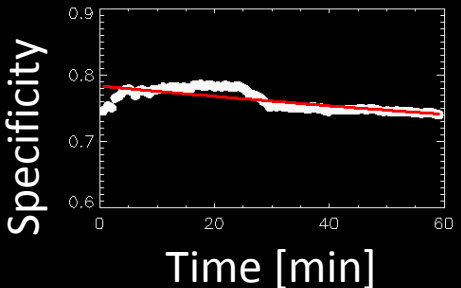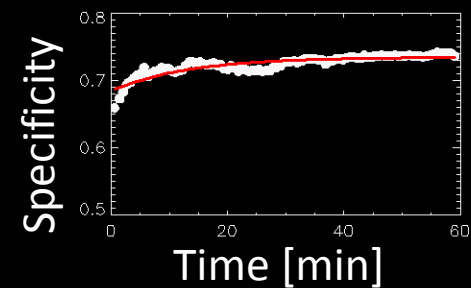

Supplement: suppfigs.pdf [file suppfigs.pdf]
